# Supplementary material for: An agar–polyvinyl alcohol hydrogel loaded with tannic acid with efficient hemostatic and antibacterial capacity for wound dressing
Source: Royal Society of Chemistry journal article supplement (doi:10.1039/d2fo02251f), 2022-01-01
Supplement: d2fo02251f1.pdf [file d2fo02251f1.pdf]

1 **Supporting Information**

2 **An agar-polyvinyl alcohol hydrogel loaded with tannic acid**  
3 **with efficient hemostatic and antibacterial capacity for**  
4 **wound dressing**

5 Can Cheng<sup>a</sup>, Xu Peng<sup>a,b</sup>, Linjie Xi<sup>c</sup>, Chang Wan<sup>a</sup>, Shubin Shi<sup>a</sup>, Yuhang Wang<sup>a</sup>, and  
6 Xixun Yu<sup>a\*</sup>

7 a. College of Polymer Science and Engineering, Sichuan University, Chengdu 610065,  
8 P.R. China. E-mail: yuxixun@163.com

9 b. Experimental and Research Animal Institute, Sichuan University, Chengdu 610065,  
10 P.R. China.

11 c. Western Theater Command Air Force Hospital, Department of Oncology  
12 Hematology, No. 137 Jiuyanqiao shunjiang Road, Chengdu, Sichuan province, 610021,  
13 P.R. China.

14

15 **Pages:6**

16 **Experimental methods:5**

17 **Figures:2**

18 **\*Xixun Yu (Corresponding author)**

19 College of Polymer Science and Engineering, Sichuan University,  
20 No.24 South Section 1, Yihuan Road, Chengdu, China, 610065, E-mail:  
21 yuxixun@163.com

22

## 23 **Materials and methods**

### 24 **Degradation ratio**

25 The degradation test of all hydrogel specimens was carried out in vitro. Briefly,  
26 the hydrogel-samples were soaked in PBS until the swelling equilibrium was reached,  
27 and after recording the initial weight, they were incubated in a shaker at 37 °C for a  
28 specified time (1 d, 3 d, 6 d, 9 d, 14 d), weighed and recorded again, and the relative  
29 degradation ratio of the hydrogels were calculated as follows:

$$30 \text{ Degradation ratio (\%)} = \frac{m_0 - m_1}{m_0} \times 100\%$$

31 Where  $m_0$  is the initial weight of hydrogel,  $m_1$  represents the weight of the  
32 corresponding hydrogel being degraded. Data from each specimen was calculated using  
33 triplicate measurement.

34

### 35 **Biomechanical performance**

36 The tensile strength of the hydrogel specimens was tested according to the method  
37 of Huang. Briefly, each sample from each group was trimmed as a test strap of 4 mm ×  
38 20 mm in size. Five tissue strips in each group were extended on an Instron material  
39 testing machine (Instron Co. USA) from 0 g load until the tissue strip ruptured at a  
40 constant speed of 10 mm min<sup>-1</sup>. After measurement, the ultimate tensile stress and the  
41 ultimate tensile strain were recorded before failure.

42 The compression strength was determined by a similar method. Briefly, the  
43 hydrogels with a height of 10 mm and a diameter of 18 mm were prepared for the  
44 compression test. The displacement rate was set as 5 mm min<sup>-1</sup>. The stress, strain, and  
45 compression modulus were recorded and calculated until the sample broke.

46

### 47 **Cytotoxicity assay**

48 L929 mouse fibroblast cells were seeded in DMEM with 10% FBS and antibiotics  
49 (1% penicillin-streptomycin). The cells were incubated at 37 °C in a humidified  
50 incubator with 5% CO<sub>2</sub>. For sub-cultivation, 0.25% trypsin was used to detach cells  
51 from culture plate.

52 All specimens were sterilized by γ-rays for 15 min with an irradiation  
53 measurement of 25 KGy. Then, the sterilized samples were placed in 24-well plates and  
54 soaked overnight in DMEM medium without serum.

55 CCK-8 array was adopted to measure the cytotoxicity of AGAR@PVA-TA  
56 hydrogels. CCK-8 can be reduced to yellow formazan product by dehydrogenase in

57 cells. The quantity of formazan produced was directly proportional to the number of  
58 living cells. 200 µl P3 generation of L929 cells ( $1 \times 10^5$  cells/ml) were slowly dropped  
59 onto the surface of the hydrogels. After incubation for 3 h, 800 µl serum-containing  
60 medium was added to each well. There plates were incubated in the same environment  
61 as above, and the medium was changed every other day. CCK-8 was used to evaluate  
62 the cell proliferation after 1, 3 and 5 days. Results were the average of three independent  
63 measurements.

64

#### 65 **Hemolysis test**

66 4 ml of rabbit whole blood (containing 3.8 wt% sodium citrate) was dispensed in  
67 1.5 ml centrifuge tubes and centrifuge at 1500 rpm for 15 min at 4 °C. The erythrocyte  
68 solution was obtained by diluting the lower red blood cells (RBCs) after centrifugation  
69 with isotonic PBS solution at a ratio of 1:7. About 1.6 ml PBS and 0.4 ml RBCs solution  
70 were added to the hydrogels in a 24-well plate, and all specimens were incubated at 37  
71 °C for 3 h. Meanwhile, we dispersed the RBCs in isotonic PBS buffer as a negative  
72 control and dispersed the RBCs in distilled water as a positive control. After incubating  
73 for 3 h, all samples were centrifuged at 3000 rpm for 4 min, the 100 µl of corresponding  
74 samples supernatant was transferred to a 96-well plate, and the absorbance of their  
75 released hemoglobin was measured using a spectrophotometer at 570 nm. All  
76 experiments were performed in triplicate. The hemolysis rate of different hydrogels was  
77 calculated as follows:

78 
$$\text{Hemolysis rate (\%)} = \frac{\text{Suspensions}_{abs} - \text{Negative control}_{abs}}{\text{Positive control}_{abs} - \text{Negative control}_{abs}} \times 100\%$$

79 The hydrogel specimens were removed from the above hemolysis rate  
80 determination experiment. Samples were gently washed in PBS solution to remove the  
81 unadhesive RBCs, and immersed in 2.5% glutaraldehyde solution and fixed at 4 °C for  
82 24 h. The hydrogels were then gradient-dehydrated by ethanol (30%, 50%, 70%, 90%,  
83 95%, 98% and 100%) and underwent critical point drying. Finally, the adhesion of red  
84 blood cells on the specimen surface was observed by SEM.

85

#### 86 **Antibacterial studies**

87 The antibacterial ability of AGAR@PVA-TA hydrogels was determined by plate  
88 count method and agar disc diffusion test, and Staphylococcus aureus and Escherichia  
89 coli were used as model bacteria.

90 For plate count method, the bacteria were first incubated in Nutrient Broth (NB)

91 at 37 °C until the exponential growth phase. The bacterial broth was then diluted with  
92 saline and a concentration of  $1 \times 10^7$  colony forming units (CFU)/ml was used for  
93 subsequent experiments. Each hydrogel specimen was made into a disk of 1 cm  
94 diameter and 4 mm thickness, sterilized and placed in a 12-well plate. 30 µl of the above  
95 bacterial suspension and 270 µl of saline were added to the surface of each hydrogel  
96 and co-cultivated for 3 h at 37 °C, the blank well was considered as a control group.  
97 Subsequently, the above co-cultured bacterial suspension was diluted about 1000 times  
98 and inoculated with 100 µl of this dilution on NB agar plates and incubated at 37 °C for  
99 24h. the reduction rate of bacteria was calculated by counting the numbers of CFUs on  
100 the agar plate. The bacterial reduction rate of hydrogels was calculated as follows:

101 
$$\text{Reduction rate of bacteria (\%)} = \frac{q_{\text{control}} - q_{\text{sample}}}{q_{\text{control}}} \times 100\%$$

102 Where  $q_{\text{sample}}$  and  $q_{\text{control}}$  were the number of CFUs on the agar plate for the hydrogel  
103 sample group and the control group. Data from each sample was calculated using  
104 triplicate measurement.

105 In the agar disc diffusion test, the above bacterial solution was diluted 10 times  
106 and inoculated on NB agar plates, and the solution was spread evenly on the agar plates  
107 with an applicator, then the hydrogel was placed on the agar plates and the inhibition  
108 area was measured after incubation at 37 °C for 24 h. All experiments were performed  
109 in triplicate.

110

## 111 **Results and discussions**

### 112 **Degradation ratio**

113 It could be seen from Figure S1 that the degradation ratio of all hydrogel-samples  
114 was low at 14 days, and only the degradation ratio of blank group (AGAR@PVA  
115 hydrogel) exceeded 10% (11.04%). This indicated that all hydrogel-samples had good  
116 stability, and the stability increased with the increase of TA content. This was because  
117 after being subjected to freeze-thaw cycle, the agar and PVA in hydrogel had formed a  
118 large number of hydrogen bonds, which endowed the hydrogels with good stability,  
119 and TA could further increase the density of hydrogen bonds, making the stability of  
120 hydrogels further improved.

121

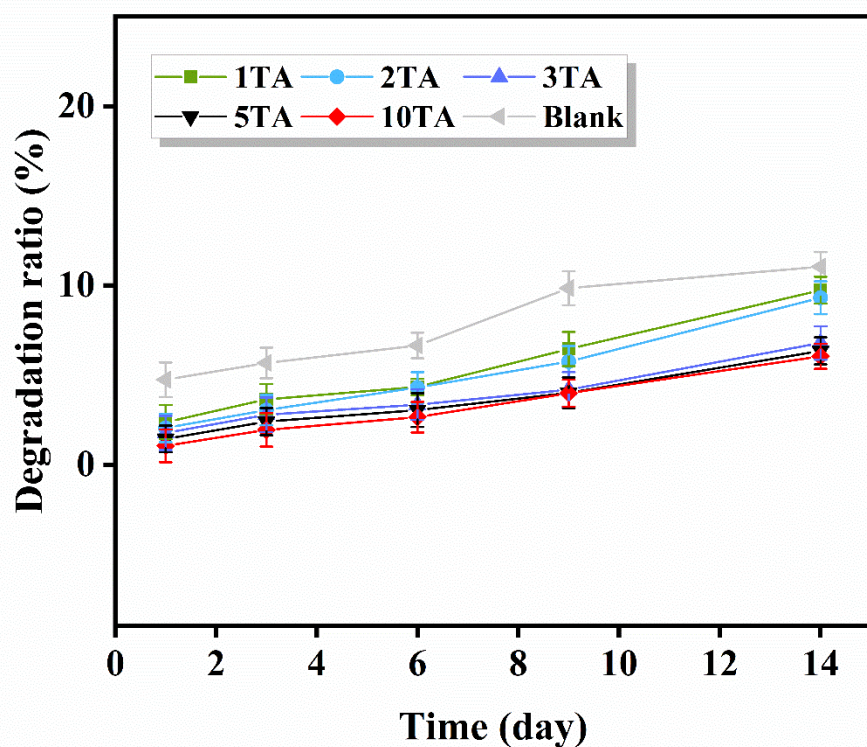

Figure S1. The degradation ratio of hydrogels with different TA concentrations.

#### Agar disc diffusion test

The antibacterial effect of the hydrogel specimen was also confirmed using the agar disc diffusion test. The areas of inhibitory zone of specimens were shown in Figure S2.

*S.aureus*

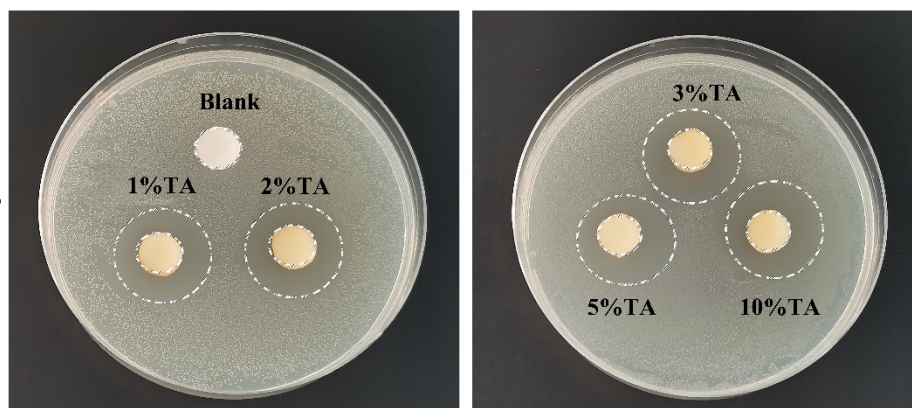

*E.coli*

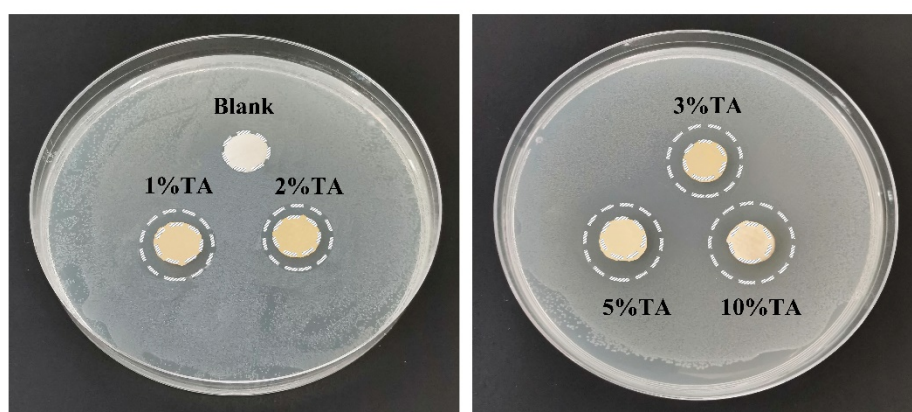

Figure. S2. Areas of inhibitory zones of different hydrogels against *E. coli* and *S. aureus*.

As can be seen from the figure, AGAR@PVA hydrogel has no antibacterial activity, but with the increased of TA concentration in hydrogel, the antibacterial ability of AGAR@PVA-TA hydrogels increased and showed better antibacterial effect against *S. aureus* and *E. coli*.
